# Supplementary material for: Synthesis, characterization and application of MCM-22 zeolites via a conventional HMI route and temperature-controlled phase transfer hydrothermal synthesis
Source: Royal Society of Chemistry journal article supplement (doi:10.1039/c4ra11434e), 2014-12-23
Supplement: c4ra11434e1.pdf [file c4ra11434e1.pdf]

**Synthesis, characterization and application of MCM-22 zeolites  
via conventional HMI route and temperature-controlled phase  
transfer hydrothermal synthesis**

Enhui Xing, Yanchun Shi, Wenhua Xie, Fengmei Zhang\*, Xuhong Mu and Xingtian

Shu

State Key Laboratory of Catalytic Materials and Reaction Engineering, Research

Institute of Petroleum Processing, Sinopec, Beijing 100083, China

\*Corresponding author: Prof. Fengmei Zhang

Address: Research Institute of Petroleum Processing Sinopec, Xueyuan Road 18,  
Beijing, China.

Tel: +86 010-82368698

E-mail: [zhangfm.ripp@sinopec.com](mailto:zhangfm.ripp@sinopec.com) (F. M. Zhang)

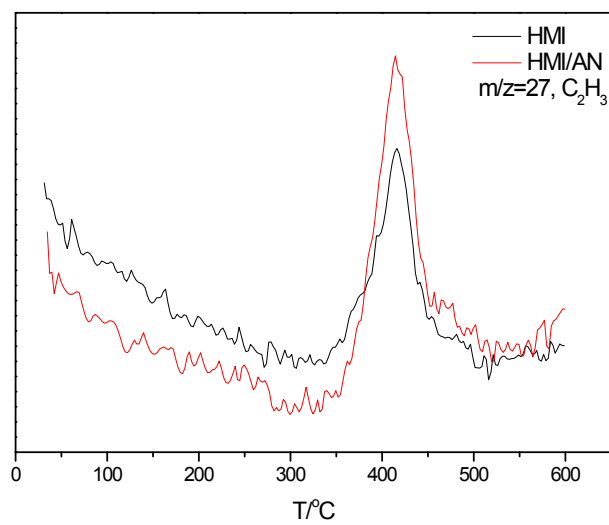

Fig. S1 TG-MS curves of MCM-22P zeolites ( $m/z = 27$ )

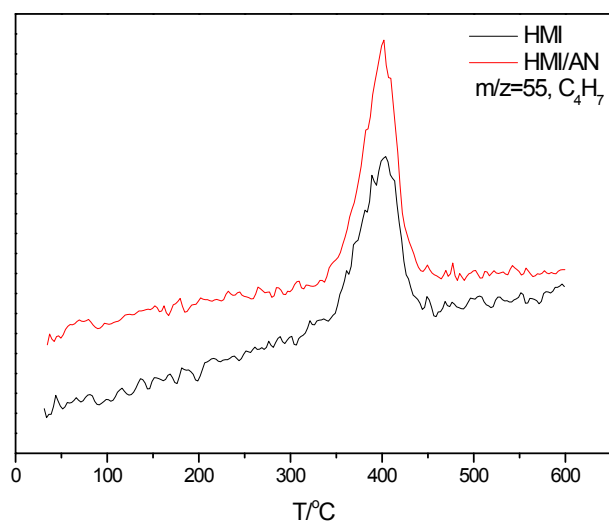

Fig. S2 TG-MS curves of MCM-22P zeolites ( $m/z = 55$ )

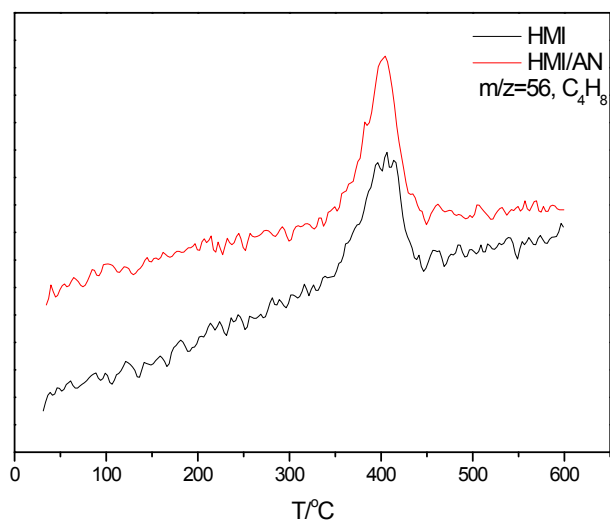

Fig. S3 TG-MS curves of MCM-22P zeolites ( $m/z = 56$ )

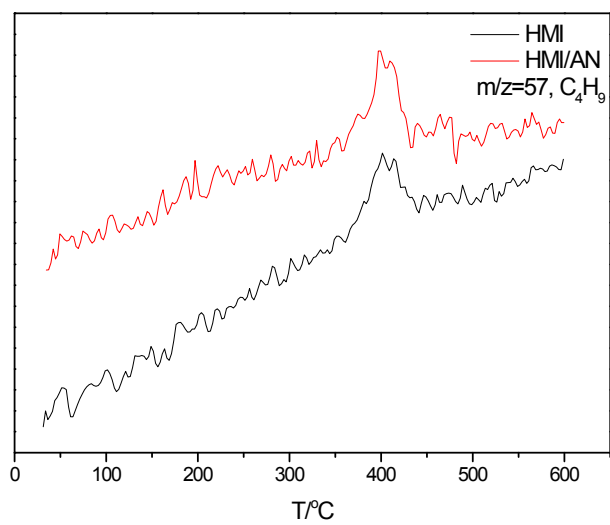

Fig. S4 TG-MS curves of MCM-22P zeolites ( $m/z = 57$ )

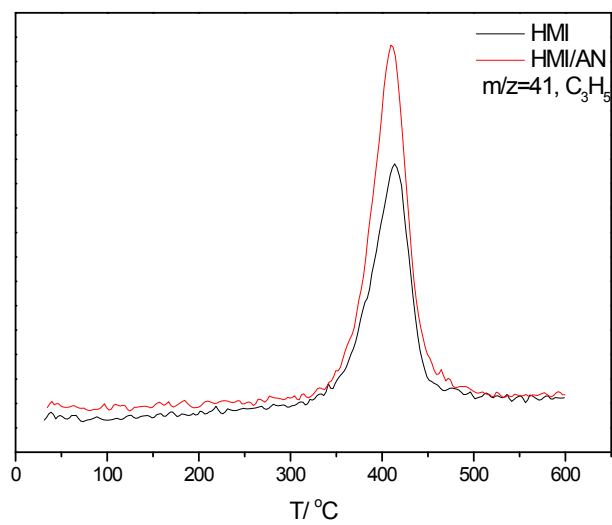

Fig. S5 TG-MS curves of MCM-22P zeolites ( $m/z = 41$ )

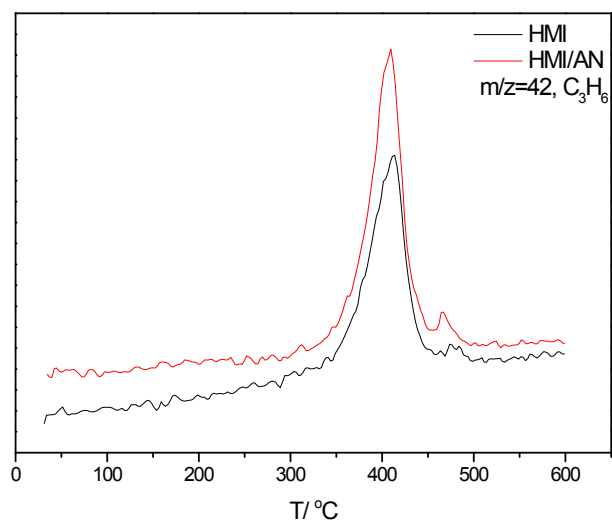

Fig. S6 TG-MS curves of MCM-22P zeolites ( $m/z = 42$ )

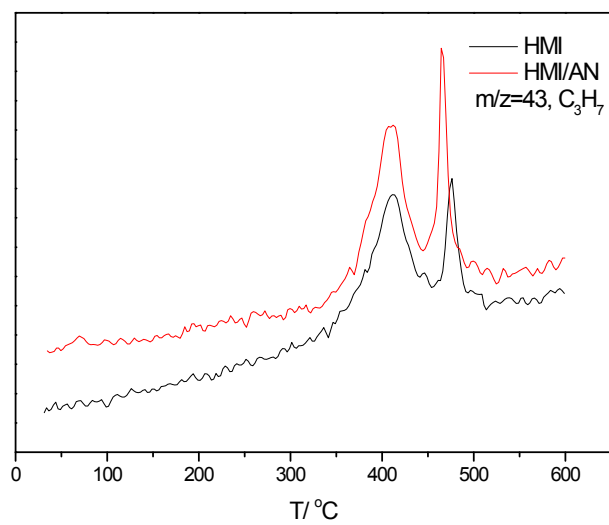

Fig. S7 TG-MS curves of MCM-22P zeolites ( $m/z = 43$ )
